# Supplementary material
Source: PubMed Central journal article supplement (PMC6365826)

**Figure S1.** Overnight cultures of *P. gingivalis* W83 (A) and 381 (B) were diluted into TSBHK (without added glucose) and grown to an OD<sub>600</sub> of 0.5. At this point, galactose (at a final concentration of 0.5%, 0.1%, or 0.05%) or sterile water (as a control) was added to the cultures, and they were incubated for 24 hours. Cultures were serially diluted in the anaerobic chamber using a microtiter plate, and 10 µL of each dilution was spotted in duplicate on blood agar plates supplemented with hemin and menadione (BAPHK). Plates were grown under anaerobic conditions for up to 5 days, and photographs were taken. Each plate represents one biological replicate. Three biological replicates were included each time the cultures were grown and plated. Enumeration of colony forming units was performed on at least three separate occasions, each showing similar results.

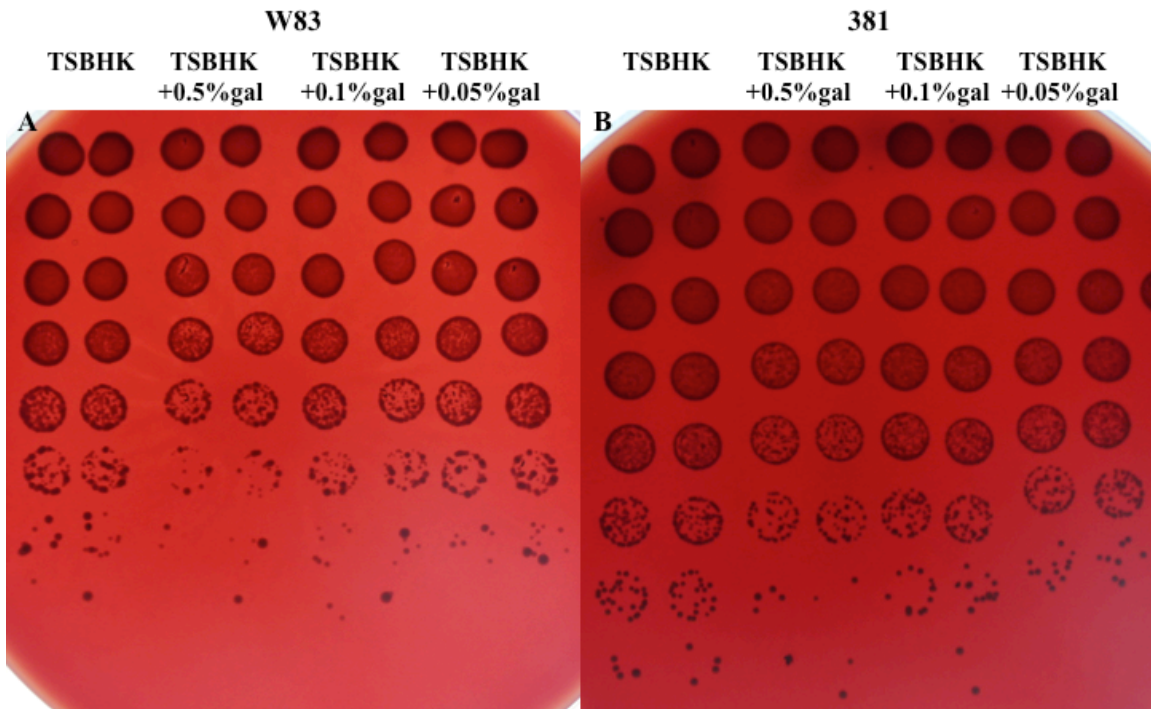

**Figure S2.** Overnight cultures of *P. gingivalis* W83 were diluted into TSBHK (without added glucose) and grown to an OD<sub>600</sub> of 0.5. Galactose (at a final concentration 0.1%) or an equal volume of sterile water (as a control) was added, and the cultures were grown an additional 24 hours. The cultures were removed from the anaerobic chamber, washed to remove excess media components, and lyophilized. Samples of the lyophilized cultures were weighed out, resuspended and used to perform a carbohydrate detection assay by the phenol-sulfuric acid method as described in the Material and Methods section. The data are representative of at least three assays, which showed similar results. The errors bars represent the standard deviation.

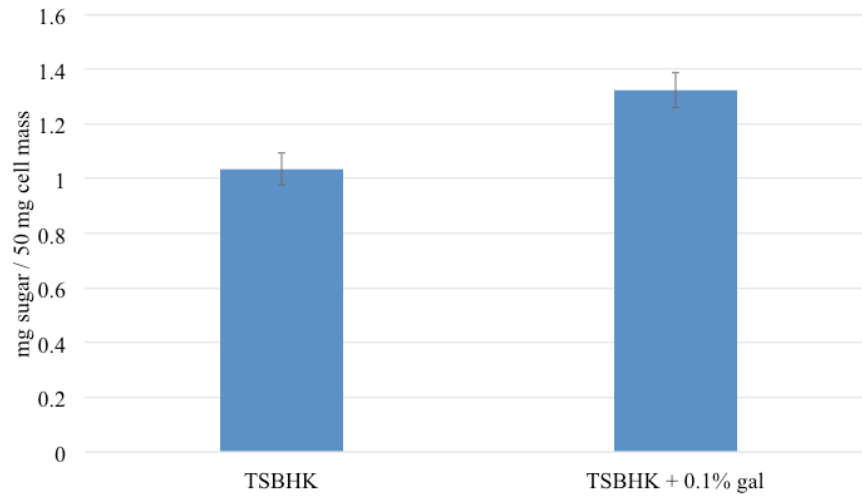

**Figure S3.** *P. gingivalis* W83 (A) or 381 (B) was grown overnight in TSBHK (without added glucose), and cultures were diluted into fresh TSBHK, grown to an OD<sub>600</sub> of 0.5, and supplemented with galactose (at a final concentration of 0.01% or 0.1%) or sterile water as a control. The optical density of the cultures was monitored over the next 3 hours (beginning immediately after the addition of galactose) to demonstrate that the increase to culture density resulting from the inclusion of galactose in the media is evident before cultures accomplish a single doubling.

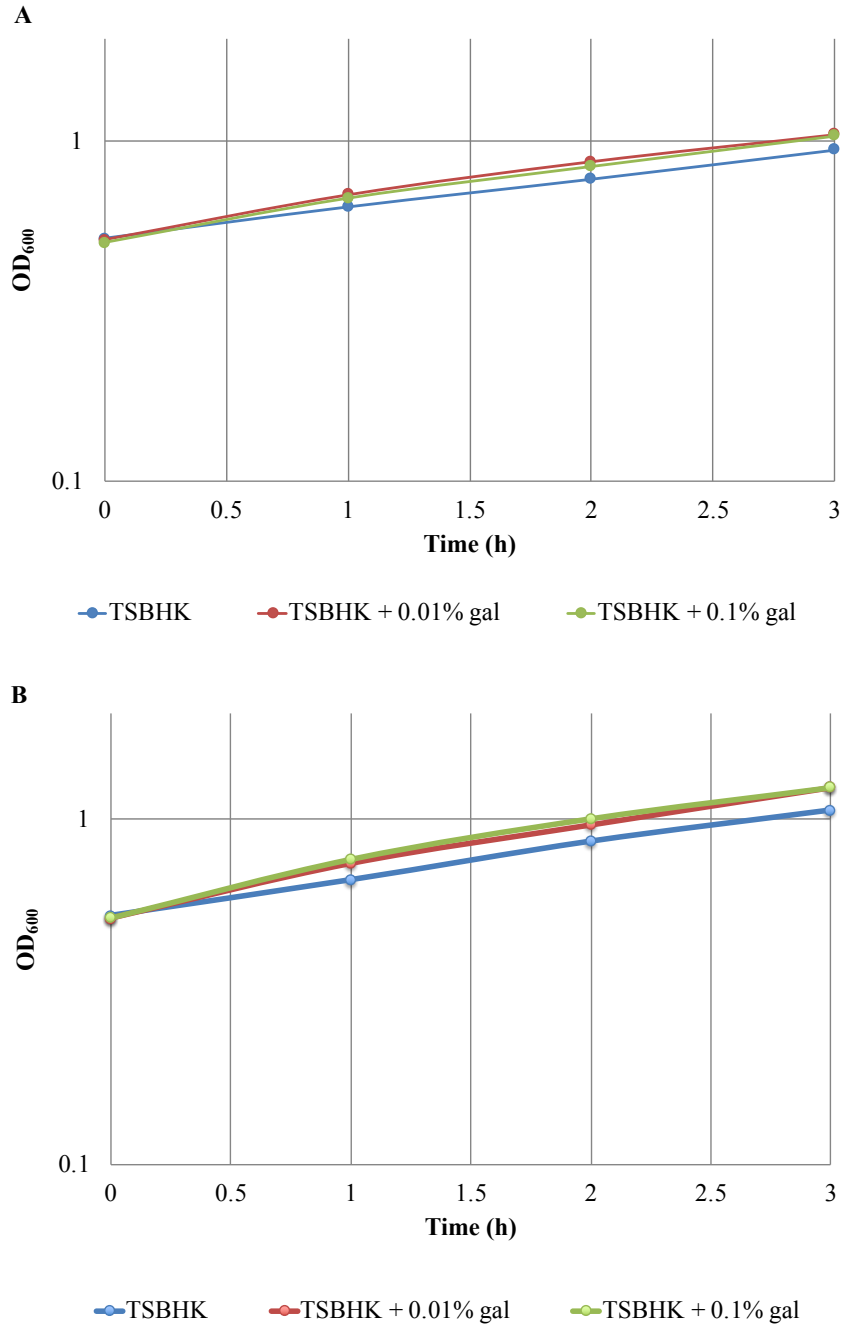

Supplement: 9ae88a1b79ef7de19016e530c29af8b5_AEM.02268-18-s0001.pdf [file 9ae88a1b79ef7de19016e530c29af8b5_AEM.02268-18-s0001.pdf]
